# Supplementary material
Source: Royal Society of Chemistry journal article supplement (doi:10.1039/d6ta00790b)
Supplement: d6ta00790b1.pdf [file d6ta00790b1.pdf]

**Joule heating-assisted preparation of high-efficiency, long-term stability FeNiMoO hydrogen evolution reaction catalyst**

Xuezhu He<sup>a</sup>, Jianxin Pan<sup>a</sup>, Fang Zhou<sup>a</sup>, Pengfei Zhou<sup>a,\*</sup>, Tianjing Li<sup>a</sup>, Yinglian Wang<sup>a</sup>,  
Jiacheng Luo<sup>a</sup>, Ji Li<sup>a</sup>, Ying Ren<sup>a</sup>, Zonghao Wang<sup>a</sup>, Peiyun Yuan<sup>b,\*</sup>

<sup>a</sup>College of Materials and Metallurgy, Guizhou University, Guiyang, 550025, China

<sup>b</sup>Chemistry and Chemical Engineering, Guizhou University, Guiyang, 550025, China

\*Corresponding authors

[pfzhou@gzu.edu.cn](mailto:pfzhou@gzu.edu.cn) (Pengfei Zhou)

[edsagd@163.com](mailto:edsagd@163.com) (Peiyun Yuan)

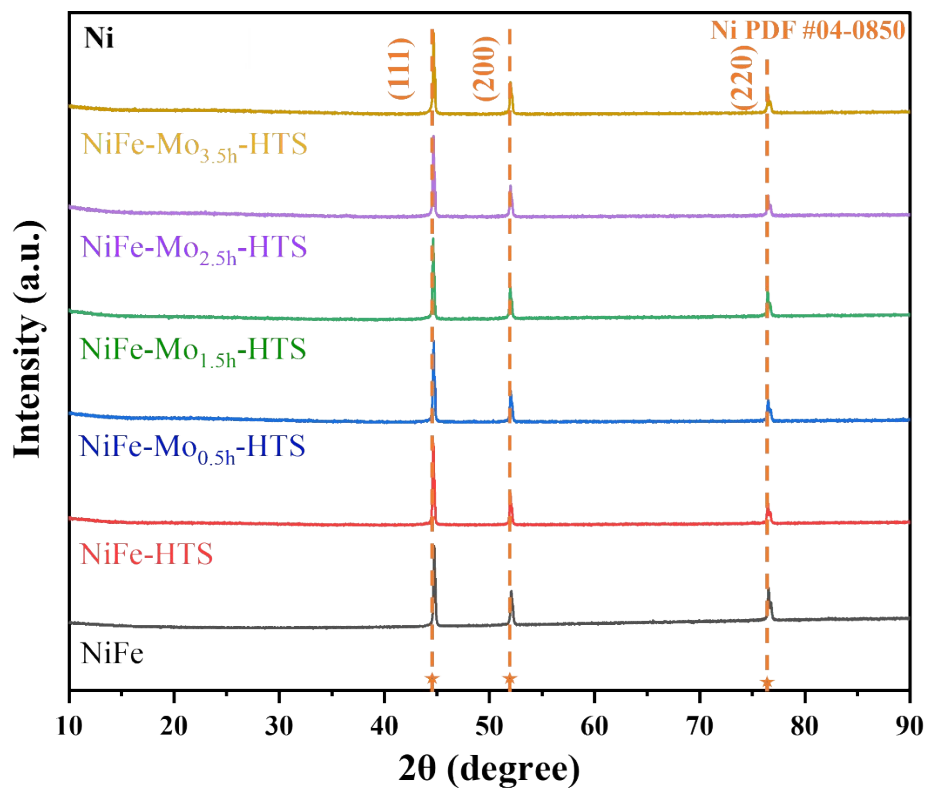

**Figure S1.** XRD images of NiFe, NiFe-HTS, and NiFeMo-HTS samples under different ammonium molybdate etching times.

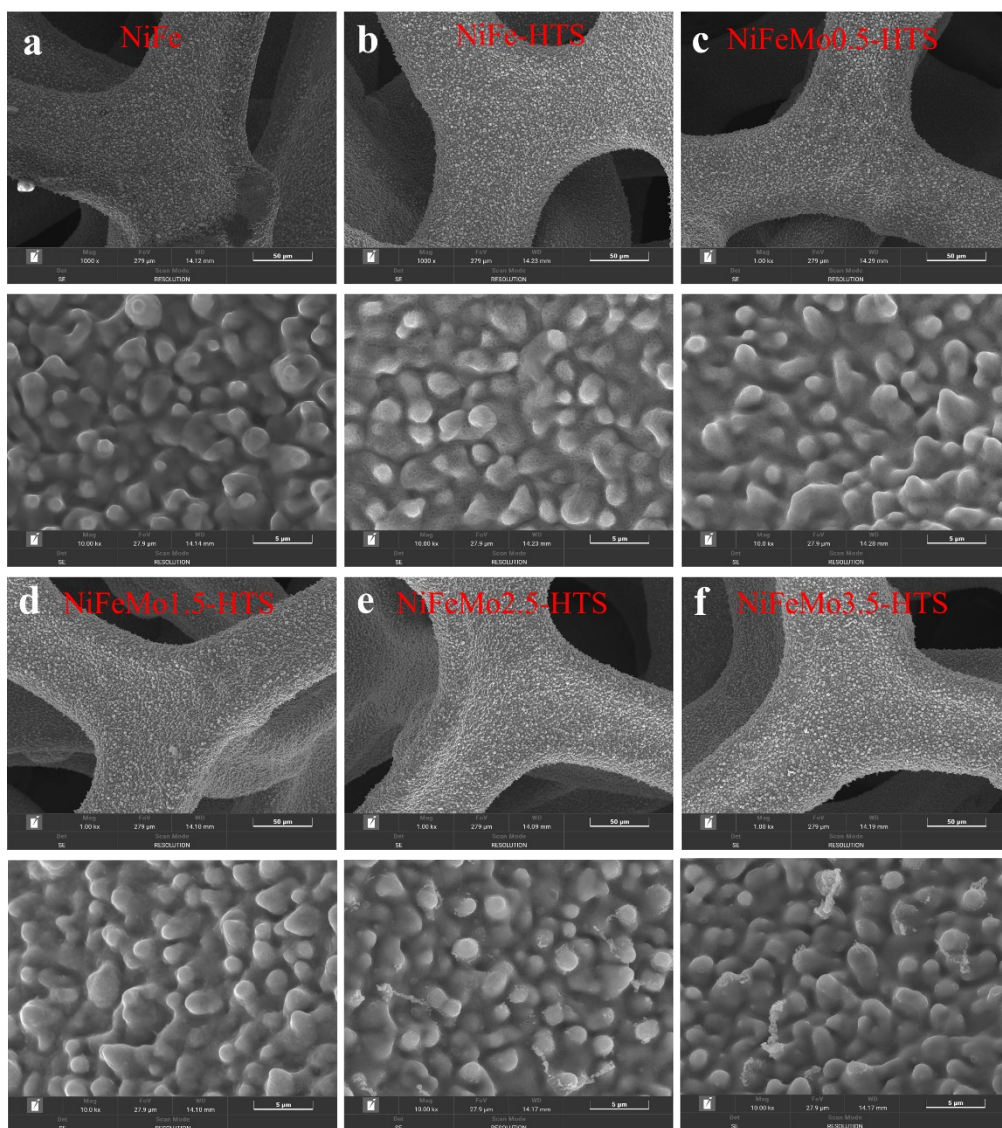

**Figure S2.** SEM images of the catalysts. (a) NiFe, (b) NiFe-HTS, (c) NiFe-Mo<sub>0.5h</sub>-HTS, (d) NiFe-Mo<sub>1.5h</sub>-HTS, (e) NiFe-Mo<sub>2.5h</sub>-HTS, (f) NiFe-Mo<sub>3.5h</sub>-HTS.

**Table S1.** The atomic percentage of the NiFe-Mo<sub>xh</sub>-HTS (x=0, 0.5, 1.5, 2.5, 3.5)

|                              | O     | Mo   | Fe   | Ni    | Molar ratio |
|------------------------------|-------|------|------|-------|-------------|
| NiFe                         | 1.12  | /    | 1.75 | 97.13 | ≈ 0:0:1:56  |
| NiFe-HTS                     | 13.25 | /    | 1.54 | 85.21 | ≈ 9:0:1:55  |
| NiFe-Mo <sub>0.5h</sub> -HTS | 13.29 | 0.67 | 1.92 | 84.12 | ≈ 7:0:1:44  |

|                              |       |      |      |       |             |
|------------------------------|-------|------|------|-------|-------------|
| NiFe-Mo <sub>1.5h</sub> -HTS | 18.52 | 4.11 | 1.45 | 75.91 | ≈ 13:3:1:52 |
| NiFe-Mo <sub>2.5h</sub> -HTS | 19.15 | 4.74 | 1.36 | 74.74 | ≈ 14:3:1:55 |
| NiFe-Mo <sub>3.5h</sub> -HTS | 28.61 | 3.9  | 1.96 | 65.53 | ≈ 15:2:1:33 |

**Table S2.** The mass fraction of the NiFe-Mo<sub>xh</sub>-HTS (x=0, 0.5, 1.5, 2.5, 3.5)

|                              | O    | Mo   | Fe   | Ni    |
|------------------------------|------|------|------|-------|
| NiFe                         | 0.31 | /    | 1.68 | 98.01 |
| NiFe-HTS                     | 4.00 | /    | 1.63 | 94.37 |
| NiFe-Mo <sub>0.5h</sub> -HTS | 4.00 | 1.20 | 2.02 | 92.79 |
| NiFe-Mo <sub>1.5h</sub> -HTS | 5.67 | 7.54 | 1.55 | 85.24 |
| NiFe-Mo <sub>2.5h</sub> -HTS | 5.86 | 8.71 | 1.46 | 83.97 |
| NiFe-Mo <sub>3.5h</sub> -HTS | 9.56 | 7.82 | 2.28 | 80.34 |

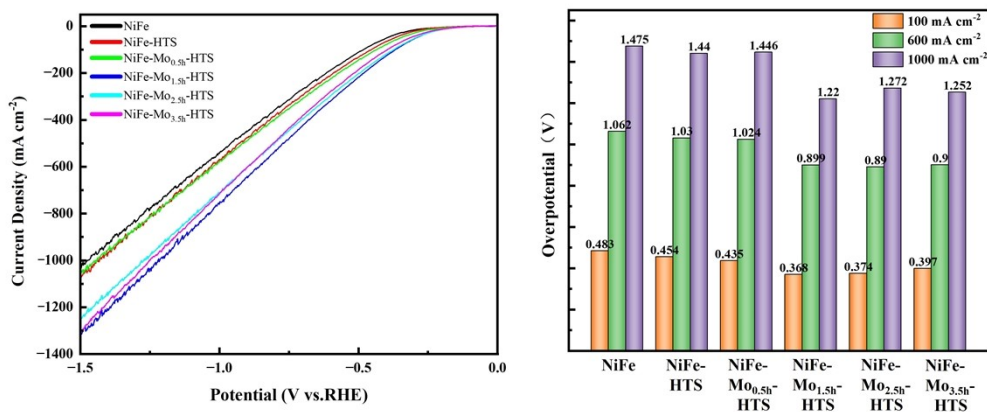

**Figure S3.** LSV curves of NiFe, NiFe-HTS, and NiFeMo-HTS samples under different

ammonium molybdate etching times.

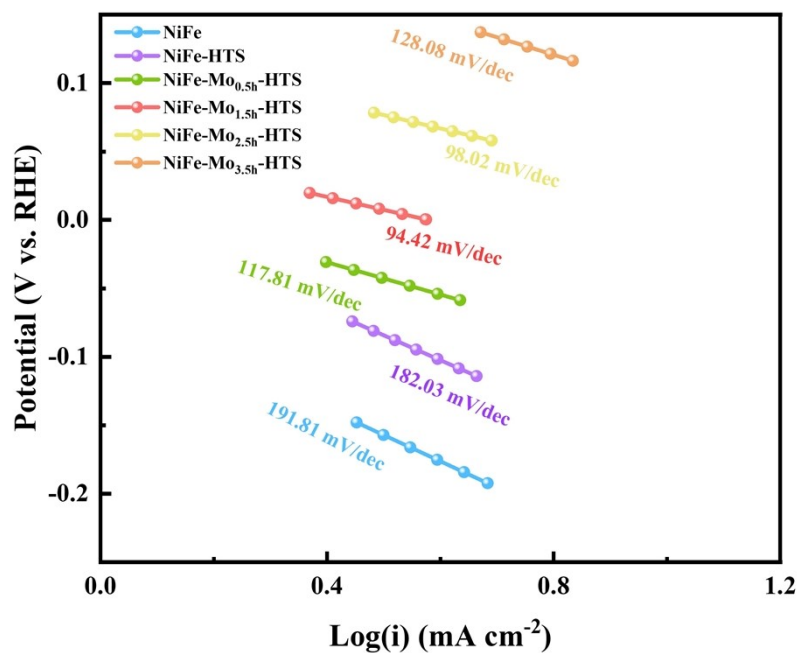

**Figure S4.** Tafel slopes of NiFe, NiFe-HTS, and NiFeMo-HTS samples under different ammonium molybdate etching times.

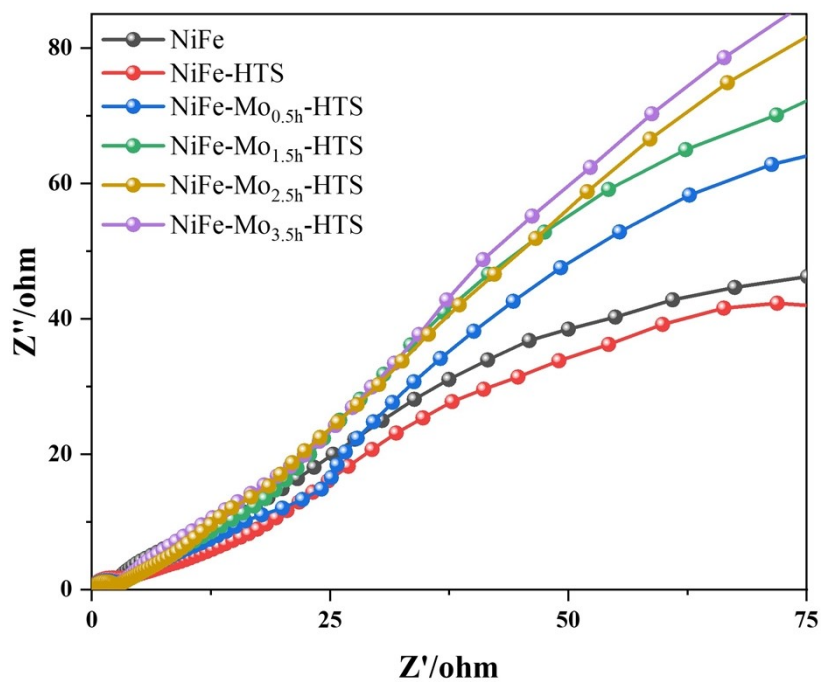

**Figure S5.** EIS of NiFe, NiFe-HTS, and NiFeMo-HTS samples under different ammonium molybdate etching times.

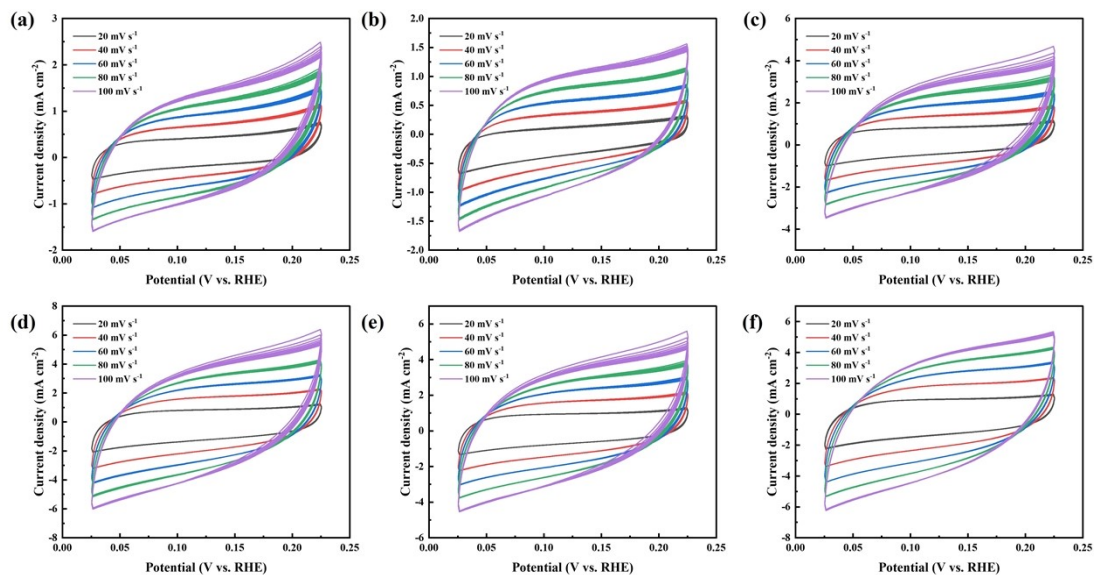

**Figure S6.** CV curves of (a) NiFe, (b) NiFe-HTS, (c) NiFe-Mo<sub>0.5h</sub>-HTS, (d) NiFe-Mo<sub>1.5h</sub>-HTS, (e) NiFe-Mo<sub>2.5h</sub>-HTS and (f) NiFe-Mo<sub>3.5h</sub>-HTS.

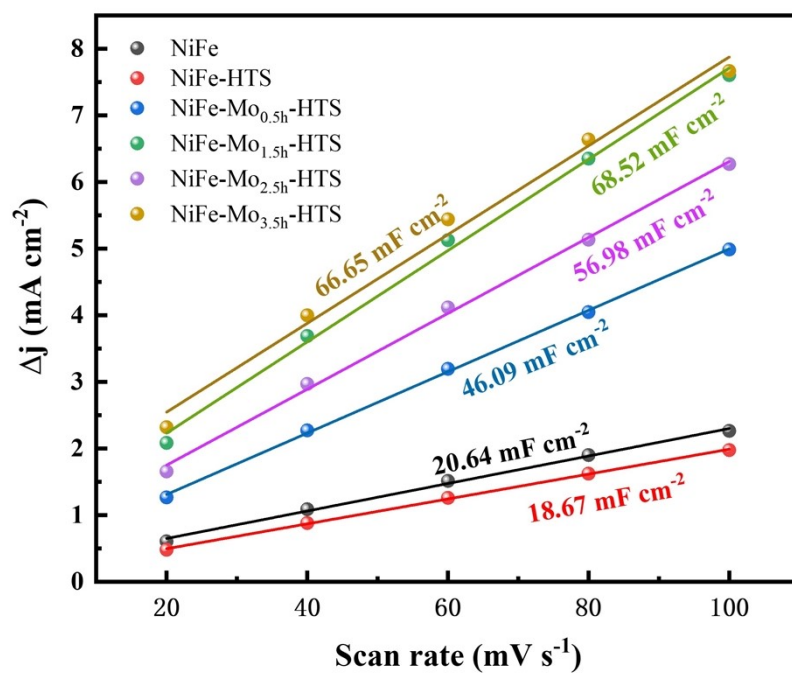

**Figure S7.** Cdl of NiFe, NiFe-HTS, and NiFeMo-HTS samples under different ammonium molybdate etching times.

**Table S3.** The comparison between this work and other catalysts for HER stability.

| Catalysts                                  | Potential                           | Stability                         | ECSA   | iR correction | Preparation method                    | Reference |
|--------------------------------------------|-------------------------------------|-----------------------------------|--------|---------------|---------------------------------------|-----------|
| NiFeMo <sub>1.5h</sub> -HTS                | 1000mA cm <sup>-2</sup> ,<br>1220mV | 400mA cm <sup>-2</sup> ,<br>3000h | 1713   | No            | Joule heating                         | This work |
| NiFeMo IOS                                 | 10mA cm <sup>-2</sup> ,<br>33mV     | 500mA cm <sup>-2</sup> ,<br>50h   | /      | No            | Electrodeposition                     | 1         |
| Ni <sub>2</sub> P/CoP/FeP <sub>4</sub> /IF | 100mA cm <sup>-2</sup> ,<br>127mV   | 500mA cm <sup>-2</sup> ,<br>25h   | 812.15 | No            | Hydrothermal                          | 2         |
| NiFe-LDH                                   | 10mA cm <sup>-2</sup> ,<br>88.5mV   | 500mA cm <sup>-2</sup> ,<br>12h   | 1.775  | No            | Hydrothermal                          | 3         |
| FeCoP/NiFe LDH                             | 100mA cm <sup>-2</sup> ,<br>153mV   | 100mA cm <sup>-2</sup> ,<br>100h  | 391.5  | Yes           | Hydrothermal                          | 4         |
| Ni/MnO                                     | 10mA cm <sup>-2</sup> ,<br>114mV    | 500mA cm <sup>-2</sup> ,<br>72h   | 1113.5 | No            | Coprecipitation                       | 5         |
| Ru-Co/NCW                                  | 1000mA cm <sup>-2</sup> ,<br>242mV  | 100mA cm <sup>-2</sup> ,<br>100h  | 64.7   | Yes           | High-temperature nitridation          | 6         |
| CuO@NiO/Ni                                 | 100mA cm <sup>-2</sup> ,<br>86.5mV  | 500mA cm <sup>-2</sup> ,<br>100h  | 301.25 | No            | Electrodeposition                     | 7         |
| Ru <sub>SA</sub> /NiFe-LDH/MoNiS           | 500mA cm <sup>-2</sup> ,<br>234mV   | 500mA cm <sup>-2</sup> ,<br>200h  | 579.25 | No            | High-temperature pyrolysis            | 8         |
| NiRu@C                                     | 10mA cm <sup>-2</sup> ,<br>33mV     | 1000mA cm <sup>-2</sup> ,<br>200h | /      | No            | High-temperature pyrolysis            | 9         |
| Ni <sub>2</sub> V/V                        | 100mA cm <sup>-2</sup> ,<br>200mV   | 500mA cm <sup>-2</sup> ,<br>100h  | 2105.3 | No            | High-temperature solid-state reaction | 10        |
| Pd-CoNiP/NF                                | 100mA cm <sup>-2</sup> ,<br>65mV    | 100mA cm <sup>-2</sup> ,60h       | 179.83 | Yes           | Heat treatment                        | 11        |
| PtNiCuCoPd                                 | 10mA cm <sup>-2</sup> ,<br>38mV     | 200mA cm <sup>-2</sup> ,96h       | 1908   | No            | Magnetron sputtering                  | 12        |

|                   |                                  |                                   |     |     |                                                |    |
|-------------------|----------------------------------|-----------------------------------|-----|-----|------------------------------------------------|----|
| AlNbPt            | 100mA cm <sup>-2</sup> ,<br>69mV | 800mA cm <sup>-2</sup> ,<br>100h  | 809 | Yes | High-<br>temperature<br>melting /<br>quenching | 13 |
| Vo-<br>NiMoOOH/NF | /                                | 500mA cm <sup>-2</sup> ,<br>150h  | /   | No  | Hydro-<br>thermal                              | 14 |
| Rh/Co-NDC         | /                                | 1000mA cm <sup>-2</sup> ,<br>550h | 55  | No  | Solvo-<br>thermal<br>synthesis                 | 15 |

**Table S4.** The atomic percentage of the NiFe-Mo<sub>1.5h</sub>-HTS after stability test

|        | O     | Mo   | Fe   | Ni    | Molar ratio |
|--------|-------|------|------|-------|-------------|
| Before | 18.52 | 4.11 | 1.45 | 75.91 | ≈ 13:3:1:52 |
| After  | 7.33  | 5    | 2.16 | 85.48 | ≈ 3:2:1:40  |

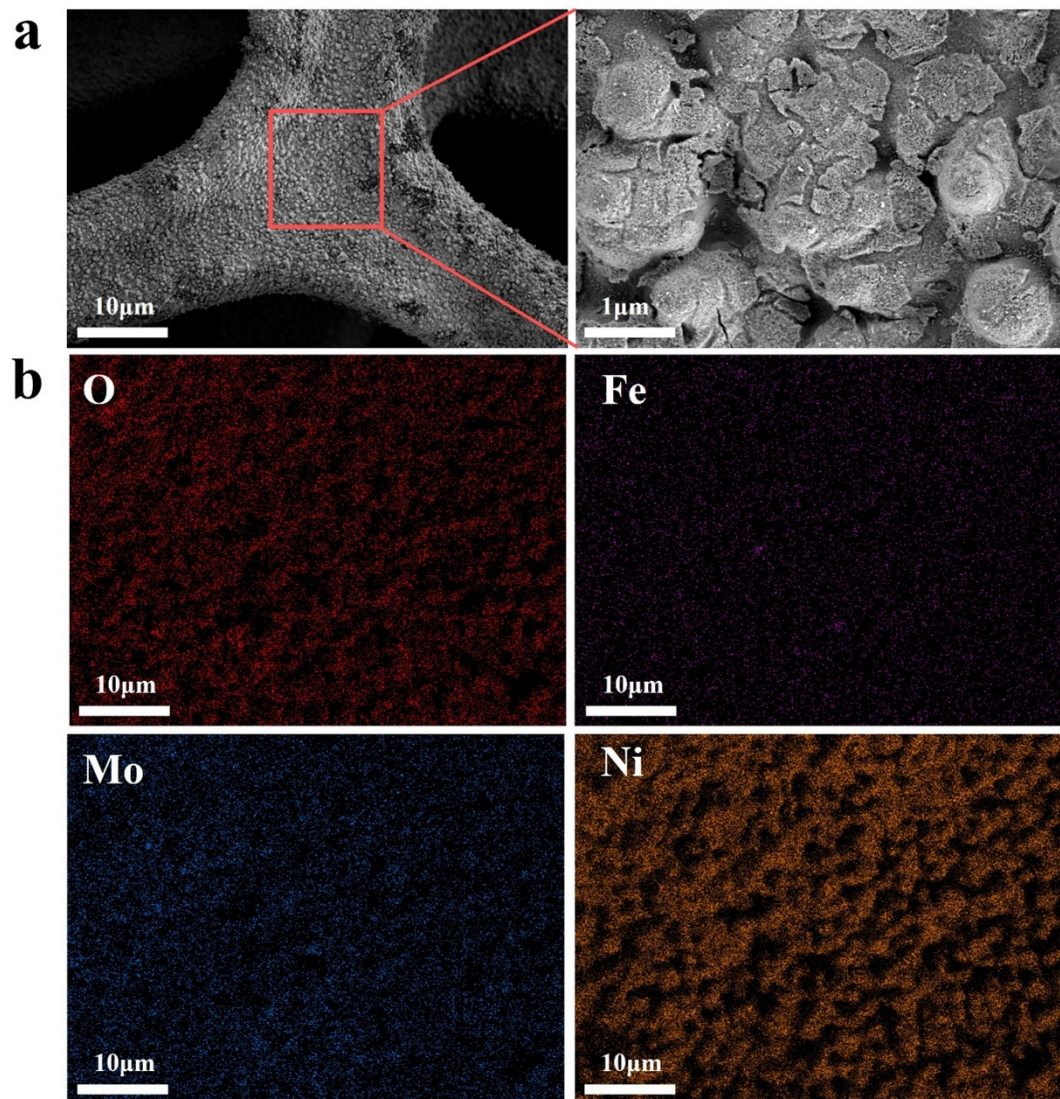

**Figure S8.** SEM images (a) and corresponding EDS mappings (b) of NiFe-Mo<sub>1.5h</sub>-HTS after the stability test.

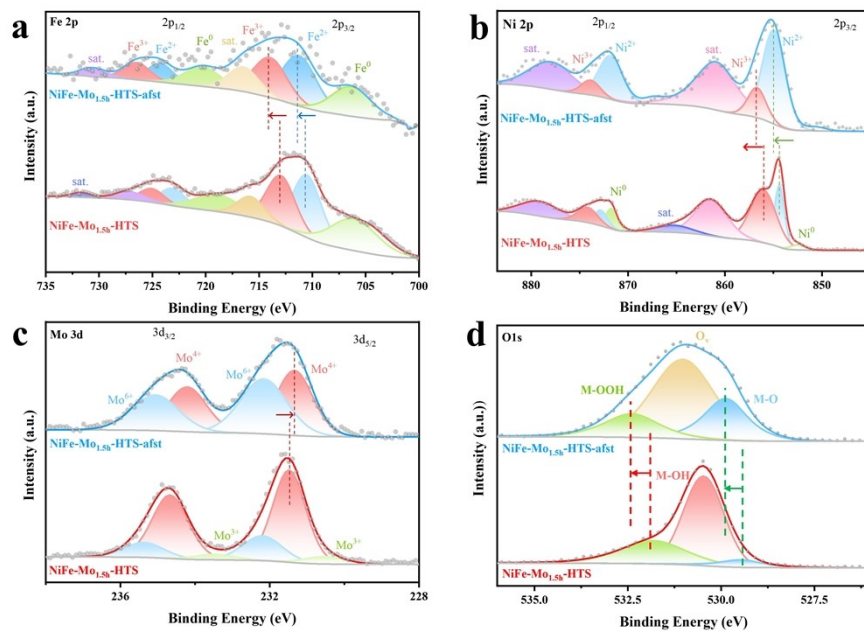

**Figure S9.** High -resolution XPS spectra of (a) Fe 2p, (b) Ni 2p, (c) Mo 3d and (d) O 1s before and after stability test.

### References:

1. C.-T. Hsieh, C.-L. Huang, Y.-A. Chen and S.-Y. Lu, *Appl Catal, B*, 2020, **267**.
2. T. Zhao, B. Gong, G. Xu, J. Jiang and L. Zhang, *Chin J Catal*, 2024, **61**, 269-280.
3. X. Li, S.-l. Xu, J. Li, S.-s. Zhang, B.-y. Zhang, R.-d. Zhao, D.-p. Zhao and F.-f. Wu, *Nanoscale Adv*, 2025, **7**, 5546-5560.
4. Y. Lu, W. Peng, W. Zhang, W. Li, J. He, D. Zhou and W. Hu, *Int J Hydrogen Energy*, 2025, **118**, 102-112.
5. S. Liang, P. Wang, J. Deng, J. Liu, B. Zhu, C. Chen, B. Zhu, X. Zhang, P. Zhu, S. Zhao, H. Gong and J. Liu, *J Power Sources*, 2026, **662**, 238730.
6. W. Chen, G. Lei, H. Hou, M. Li, Y. Yu, H. Huo, W. Feng, G. Qian and D. Min,

Comment [PZ]: 稳定性后 Ni0 的不要了

- J Electroanal Chem*, 2025, **999**, 119566.
7. F. Chen, J. Zhou, W. Peng, X. Feng, Z. Zhao, Y. Yuan, T. Wang and F. Gao, *Colloids Surf, A*, 2025, **726**, 137744.
  8. Y. Chen, X. Chen, M. Chen, H. Sun, T. He, D. Li, G. Na, Y. Wu, G. Qiu, T. Zhou, Y. Zhang, J. Zhang, F. Liu, H. Cui and Q. Liu, *Chin Chem Lett*, 2025, DOI: 10.1016/j.ccllet.2025.111813.
  9. J. Yang, X. Tang, Y. Yuan, J. Zhao, H. Shen and J. Zhao, *Fuel*, 2026, **404**.
  10. L. Wu, X. Mo, N. Wang, D. Liu, Y. Xiao, Q. Zhang, Y. Wu, Y. Jiang, X. Kang, Y. He and G. Yang, *Int J Hydrogen Energy*, 2025, **157**.
  11. D. Guo, X. Guo, L. Wen and L. Xin, *Applied Catalysis B: Environment and Energy*, 2026, **381**.
  12. Z. Yu, Y. Zhang, S. Yang, X. Liu, T. Gu, Y. Qi, Y. Li, F. Miao and Z. Yan, *Int J Hydrogen Energy*, 2025, **135**, 48-55.
  13. J. Ban, L. Chen, H. Liu and H.-J. Lin, *Int J Hydrogen Energy*, 2025, **186**, 152059.
  14. T. Chen, J. Song, M. Xu and Z. Li, *Applied Catalysis B: Environment and Energy*, 2026, **382**.
  15. N. Song, J. Han, M. Zhang, D. Wang, Z. Liu, H. Dong, Y. Wang and C. Li, *J Alloys Compd*, 2025, **1044**.
